# Supplementary material for: Determinants of early afterdepolarization properties in ventricular myocyte models
Source: PubMed Central journal article supplement (PMC6283611; doi:10.1371/journal.pcbi.1006382), 2018-11-26

# Supporting Information

We mainly varied the maximum conductance of ionic currents in the AP models to investigate the EAD properties. The control parameter set of each model was set so that it exhibits EADs (Fig.S1).

We added a late  $I_{Na}$  ( $I_{NaL}$ ) to the AP models by changing the  $h_{\infty}$  and  $j_{\infty}$  of the Na channel model as

$$h_{\infty} = \gamma + (1 - \gamma)h_{\infty}$$
$$j_{\infty} = \gamma + (1 - \gamma)j_{\infty}$$

where  $\gamma$  determines the portion of incomplete inactivation of the Na channel and thus the magnitude of  $I_{NaL}$ . We set the control  $\gamma = 0.04$  for all AP models, and varied  $\gamma$  to investigate the effects of  $I_{NaL}$  on EAD properties.

We also varied the inactivation time constant ( $\tau_f$ ) of  $I_{CaL}$  to investigate its effects on EAD properties. The control  $\tau_f$  is the same as in the original models. In the ORd model, we varied  $\tau_{jCa}$ .

Only one stimulus was given at  $t=0$  for each parameter set. The initial condition was set by the fully recovered resting state. The stimulus current density and duration were listed for each model

The control parameter sets for each model are listed below. The units of these conductance are the same as in the original models. The parameters listed for each model are the ones we assigned the [0.4p<sub>c</sub>, 1.6p<sub>c</sub>] for random parameter assignments. The parameters changed from the original models are indicated in **red text** with the original ones in the **parentheses**.

## 1. The LR1 model

$$G_{Si} = \mathbf{0.2 (0.09)}, G_K = \mathbf{1.0 (0.282)}, G_{K1} = 0.6047, G_{Kp} = 0.0183, G_b = 0.03921.$$

$$I_{sti}=40\mu A/cm^2, \text{ duration}=2 \text{ ms.}$$

## 2. The LRd model

$$G_{CaL} = \mathbf{0.002 (0.00054)}, G_{Ks} = 0.433, G_{Kr} = 0.02614, G_{Ki} = 0.75, G_{Kp} = 0.00552, G_{to} = 0.5, G_{ncx} = 2.5 \times 10^{-4}, G_{nak} = 2.25.$$

$$I_{sti} = 80 \mu A/cm^2, \text{ duration}=0.5 \text{ ms.}$$

## 3. The HUCLA model

$$G_{CaL} = \mathbf{200.0 (40.0)}, G_{Ks} = \mathbf{0.9 (0.5)}, G_{Kr} = 0.0125, G_{K1} = 0.3, G_{tos} = 0.04, G_{tof} = 0.11, G_{ncx} = 1.0, G_{nak} = 1.5.$$

$$I_{sti}=40 \mu A/cm^2, \text{ duration} = 2 \text{ ms.}$$

## 4. The TP04 model

$$G_{CaL} = \mathbf{8 \times 10^{-4} (1.75 \times 10^{-4})}, G_{Ks} = \mathbf{0.036 (0.245)}, G_{Kr} = 0.01, G_{K1} = 5.405, G_{to} = 0.294, G_{ncx} = 1000.0, G_{nak} = 1.362.$$

$$I_{sti} = 52\mu A/cm^2, \text{ duration}=1\text{ms.}$$

## 5. The ORd model

$$P_{Ca} = \mathbf{3 \times 10^{-4} (1 \times 10^{-4})}, G_{Ks} = \mathbf{0.008 (0.0034)}, G_{Kr} = \mathbf{0.0022 (0.046)}, G_{K1} = 0.1908, G_{to} = 0.02, G_{ncx} = 8 \times 10^{-4}, G_{nak} = 30.0.$$

$$I_{sti}=80 \mu A/cm^2, \text{ duration} =0.5 \text{ ms.}$$

## 6. The GB model

$$P_{Ca} = \mathbf{2.875 \times 10^{-4} (2.7 \times 10^{-4})}, G_{Ks} = \mathbf{0.05 (0.03185)}, G_{Kr} = 0.035, G_{Ki} = 0.195, G_{tos} = 0.0113, G_{tof} = 4.2e - 4, G_{ncx} = 1.845, G_{nak} = 1.76.$$

$$I_{sti} = 50 \mu A/cm^2, \text{ duration} = 1 \text{ ms.}$$

**Fig.A. The control action potentials of the AP models.**

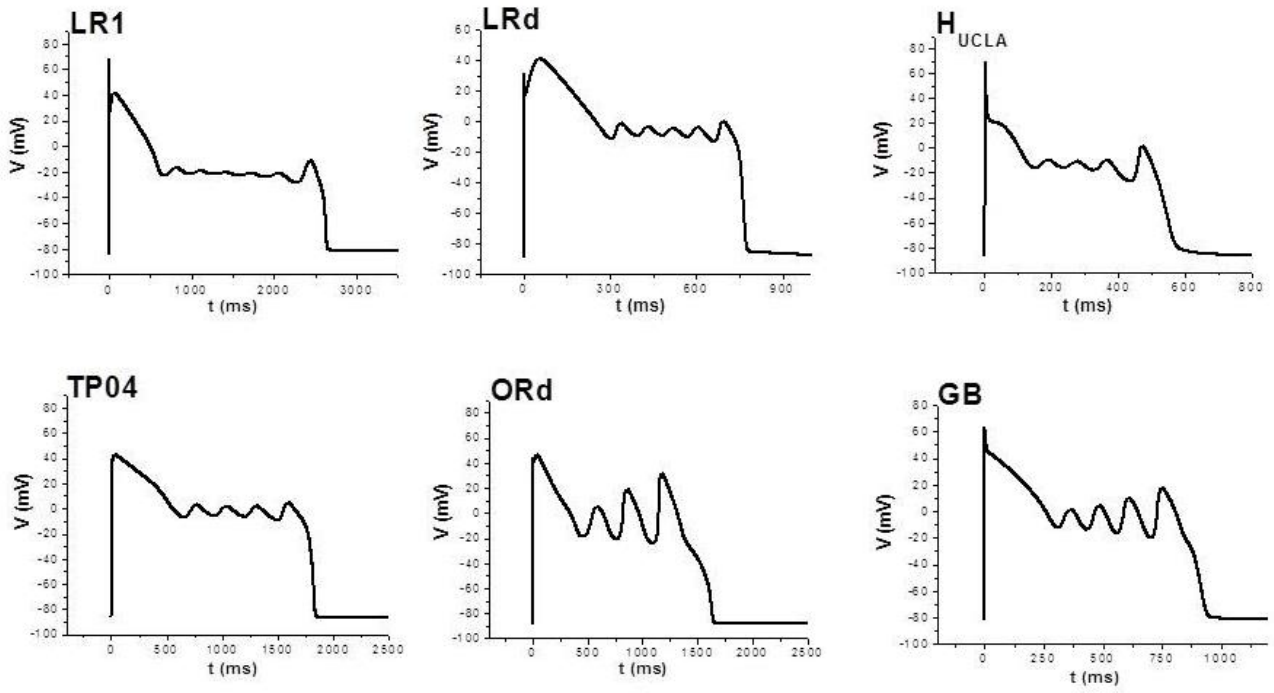

**Fig.B. Effects of the maximum conductance of  $I_{Ca,L}$  on EAD amplitude in different models.**

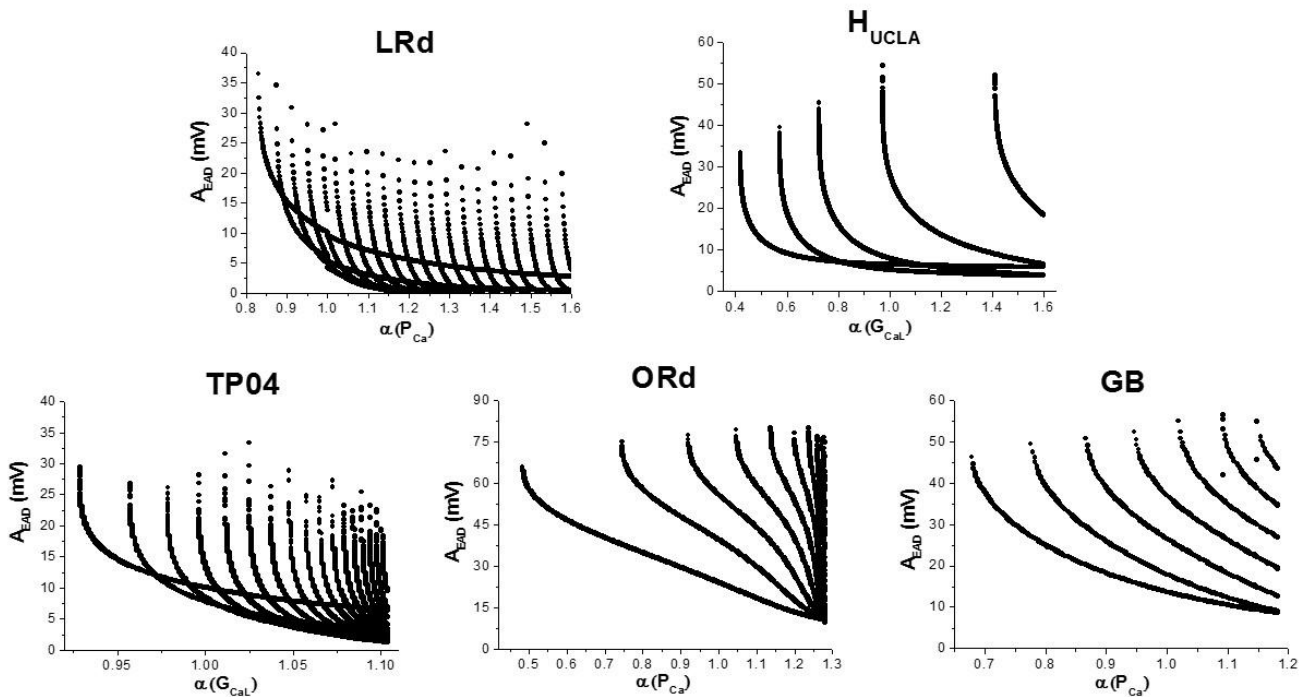

Fig. C. Effects of the maximum conductance of  $I_{Ks}$  on EAD amplitude in different models.

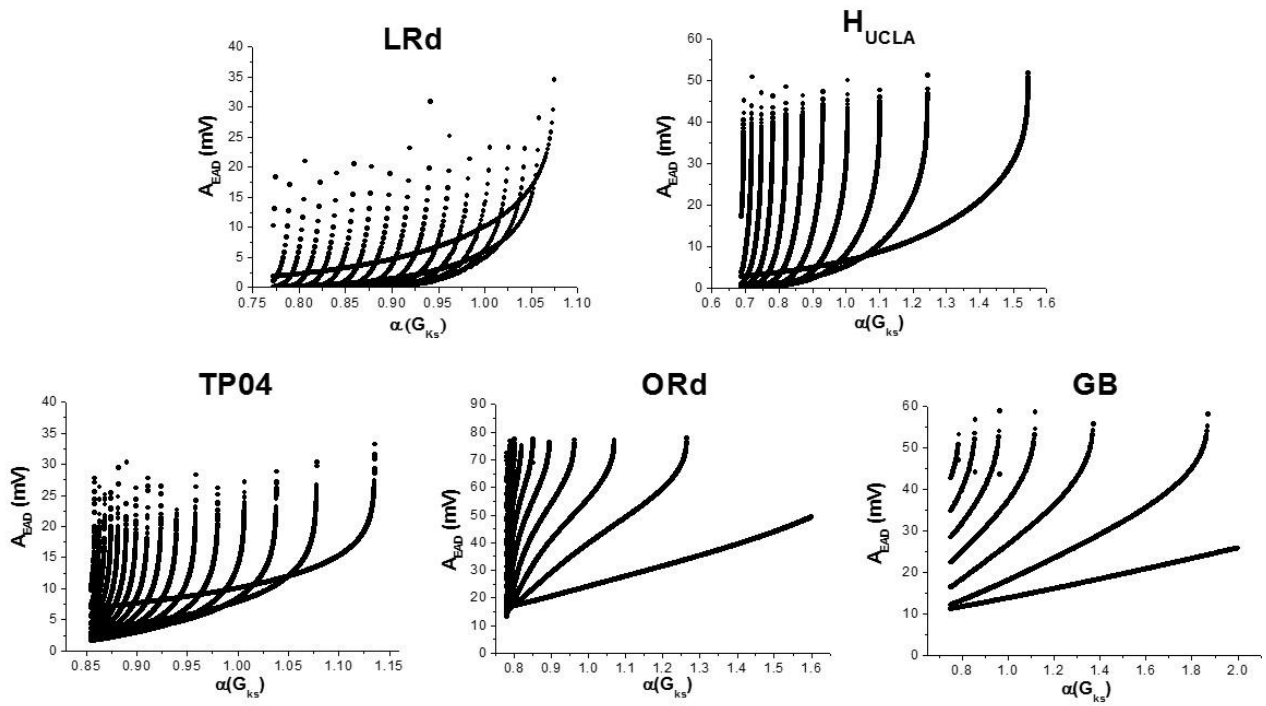

Fig. D. Effects of the maximum conductance of  $I_{Kr}$  on EAD amplitude in different models.

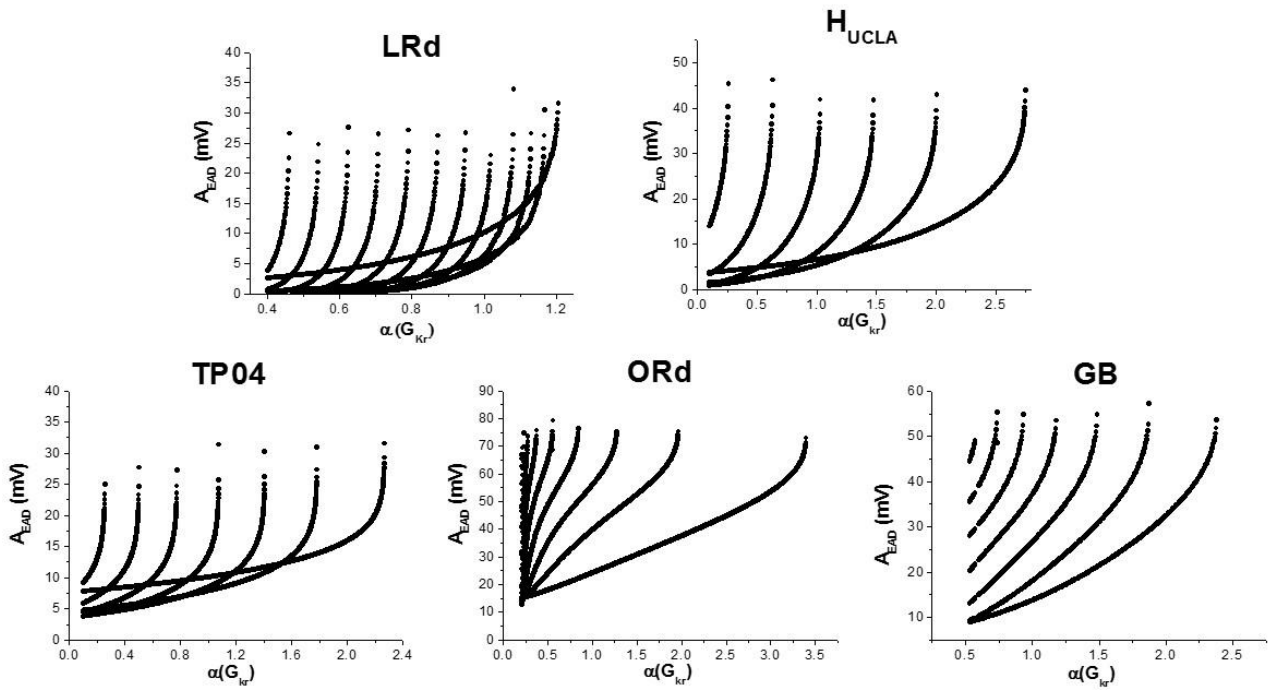

**Fig. E. Effects of the maximum conductance of  $I_{K1}$  on EAD amplitude in different models.**

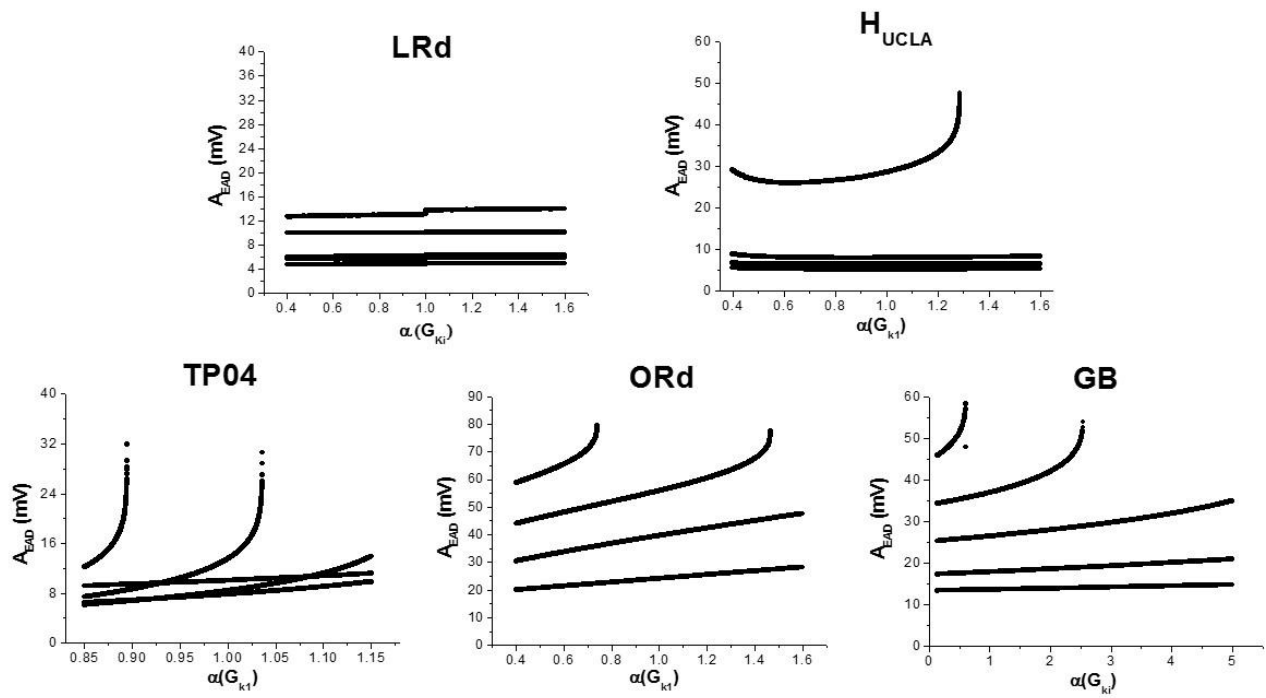

**Fig. F. Effects of the maximum conductance of  $I_{NCX}$  on EAD amplitude in different models.**

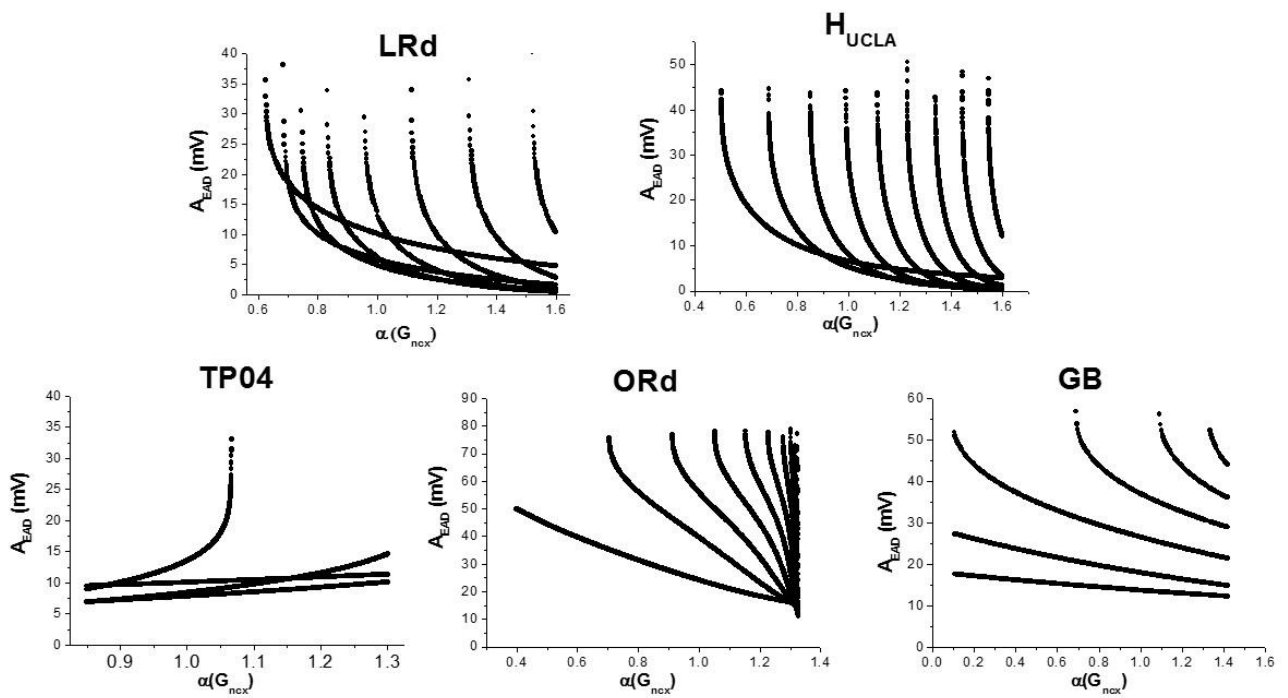

**Fig. G. Effects of the maximum conductance of  $I_{NaK}$  on EAD amplitude in different models.**

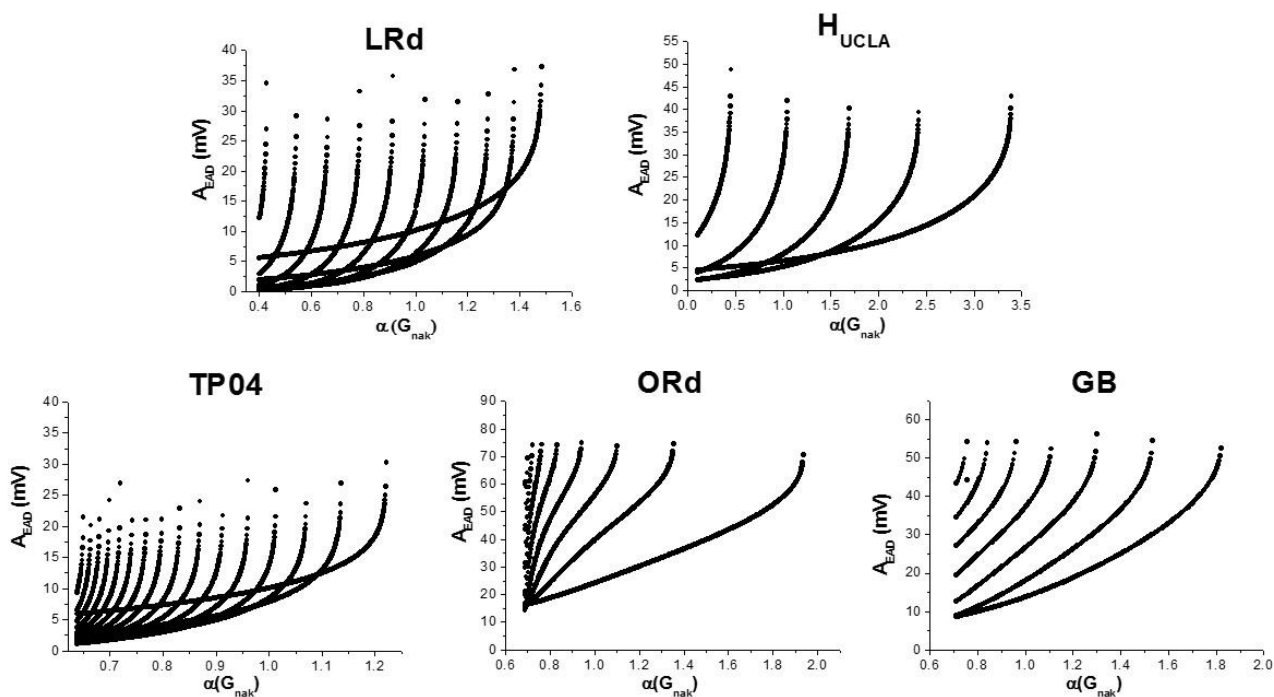

**Fig. H. Effects of the maximum conductance of  $I_{NaL}$  on EAD amplitude in different models.**

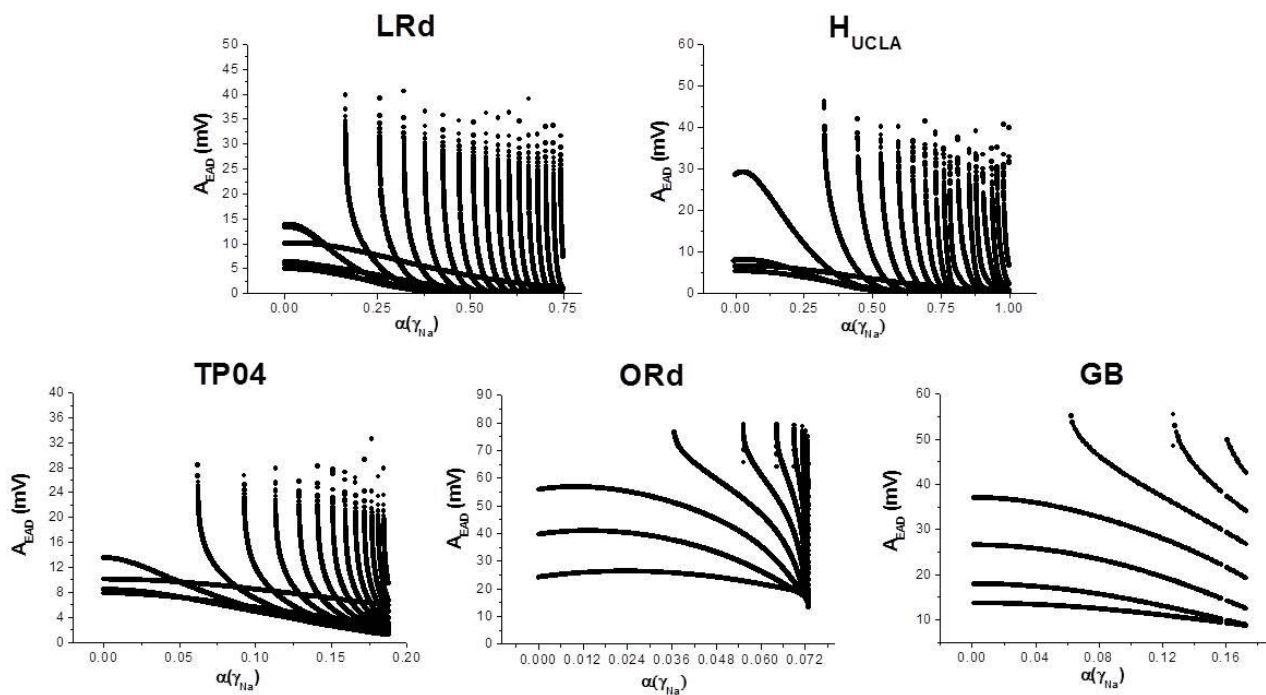

**Fig.I. Effects of the maximum conductance of  $I_{to}$  on EAD amplitude in different models.** Since we used the endocardial ORd and GB models, the control  $I_{to}$  conductance is very small, the effects of  $I_{to}$  can only be seen when  $\alpha$  is very large.

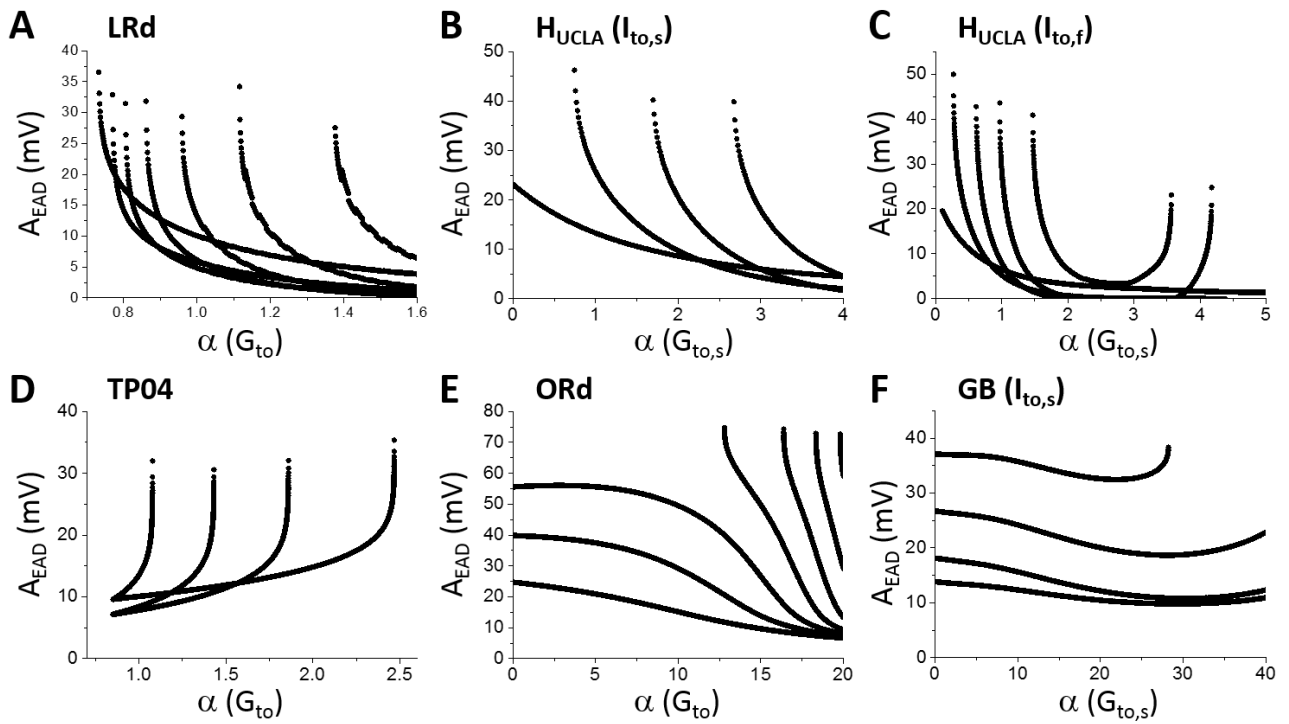

**Fig. J. Effects of the inactivation time constant ( $\tau_f$ ) of  $I_{Ca,L}$  on EAD amplitude in different models.**

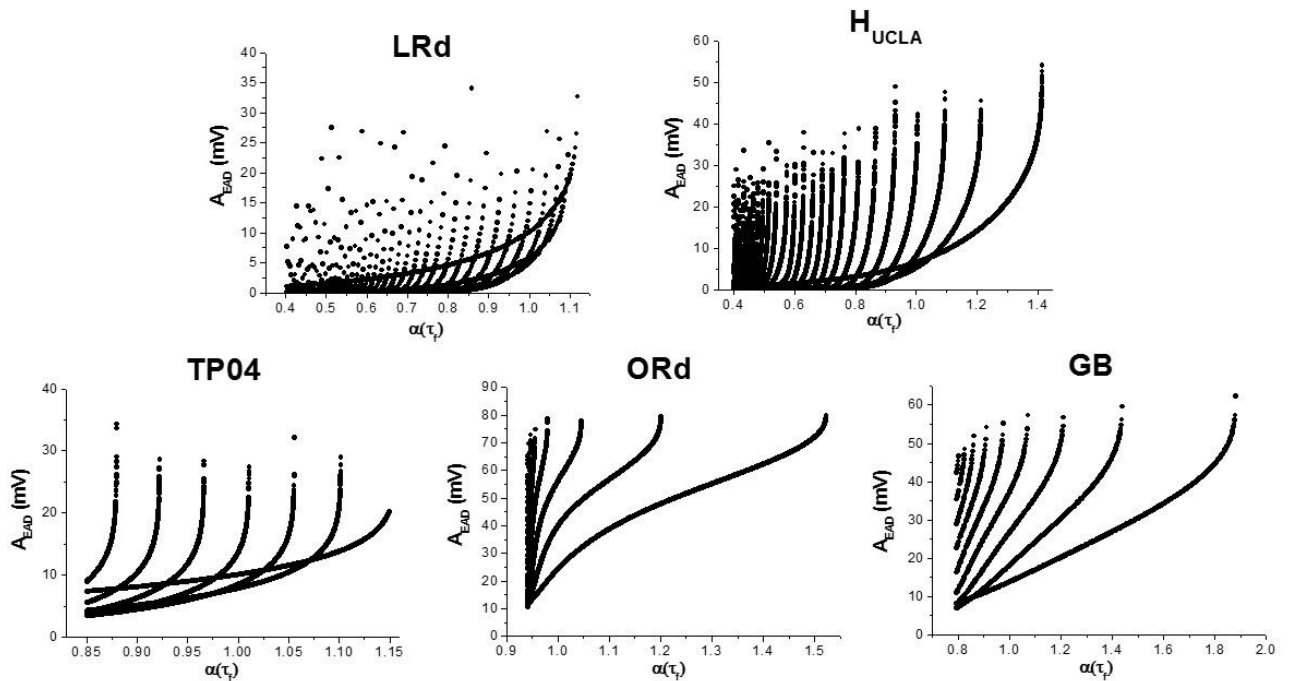

**Fig.K. EAD properties of the model by Wilson et al (Chaos, 2017).** **A.** Control action potential (black) with EADs. The red trace is the corresponding intracellular  $\text{Ca}^{2+}$  concentration. The same control parameter set as in the original model was used except 80% reduction of  $I_{K_r}$  to induced EADs ( $G_{K_r}$  was reduced from 0.045 to 0.009  $\text{mS}/\text{cm}^2$ ). **B.**  $A_{\text{EAD}}$  versus  $V_{\text{takeoff}}$  with random parameter sampling in the assigned ranges. The arrow points to the region where a gap of data points occurs. **C.**  $A_{\text{EAD}}$  versus  $\alpha$  (fold change) of the maximum  $I_{\text{Ca,L}}$  conductance ( $P_{\text{Ca}}$ ). **D.**  $A_{\text{EAD}}$  versus  $\alpha$  (fold change) of the maximum  $I_{\text{K}_s}$  conductance ( $G_{\text{K}_s}$ ). **E.**  $T_{\text{EAD}}$  versus  $\alpha$  (fold change) of the maximum conductance of different ionic currents as indicated by the colored symbols. **F.**  $T_{\text{EAD}}$  histogram. The arrow points to the abrupt change in  $T_{\text{EAD}}$  counts. **G.**  $L_{\text{EAD}}$  versus  $\alpha$  (fold change) of the maximum conductance of different ionic currents as indicated by the colored symbols. **H.**  $L_{\text{EAD}}$  histogram. We thank Drs. Wilson and Salama for providing us the original Matlab code of the model.

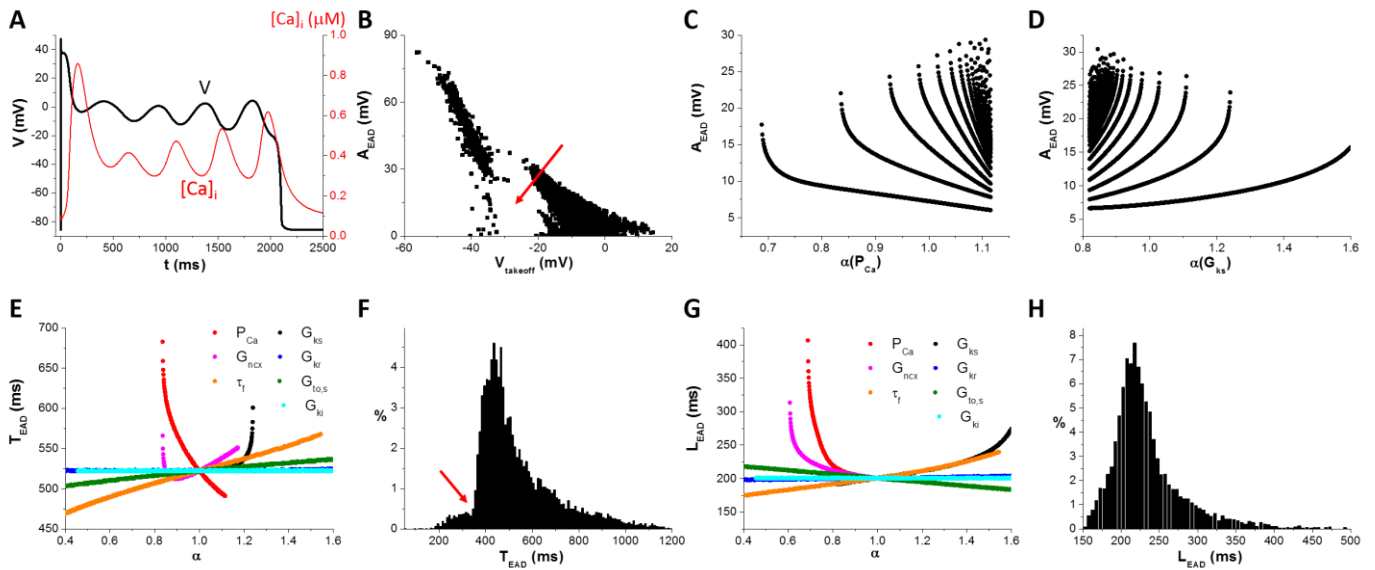

Supplement: pcbi.1006382.s001.pdf [file pcbi.1006382.s001.pdf]
